# Supplementary material for: TRPV1 protects renal ischemia-reperfusion injury in diet-induced obese mice by enhancing CGRP release and increasing renal blood flow
Source: PeerJ. 2019 Feb 27;7:e6505. doi: 10.7717/peerj.6505 (PMC6397633; doi:10.7717/peerj.6505)
Supplement: Supplemental Information 1 [file peerj-07-6505-s001.xlsx]

## Sheet: Body weight
	WT-con	TRPV1-/-con	WT-WD	TRPV-/-WD
	34	34	53	44
	26	40	47	46
	23	32	35	50
	38	31	57	36
	32	28	45	32
	30	30	42	51

## Sheet: AUC of Blood glucose
	WT-con	TRPV1-/-con	WT-WD	TRPV-/-WD
	346.75	544	689.5	828.75
	382	566.75	588.75	852.75
	449.5	617.25	823.5	728.75
	330.75	588.75	651	868.25
	330.5	482	683	833.75
	461.5	542.25	628.5	874.5

## Sheet: Urine 8-isoprostane
	WT-con	TRPV1-/-con	WT-WD	TRPV-/-WD
	76.8179	97.1794	176.204	692.281
	113.96	92.1698	267.741	459.576
	201.211	82.4157	230.413	450.87
	106.233	241.028	229.476	890.023
	117.029	53.7832	705.41	603.154
			769.233	909.907
			513.084

## Sheet: Recovery in renal cortex
	WT-con-IR	TRPV1-/-con-IR	WT-WD-IR	TRPV1-/-WD-IR
	89	77	70	54
	95	87	74	56
	98	96	54	66
	87	66	62	48
	89	74	71	57
	98	53	59	48
			79

## Sheet: Recovery in renal medulla
	WT-con-IR	TRPV1-/-con-IR	WT-WD-IR	TRPV1-/-WD-IR
	85	64	57	45
	89	77	45	41
	63	67	64	40
	96	77	57	25
	77	80	67	46
		46	80	37
			70

## Sheet: Time to peak in renal cortex
	WT-con-IR	TRPV1-/-con-IR	WT-WD-IR	TRPV1-/-WD-IR
	3.63333	7.18333	13.8667	16.8833
	2.56667	8.18333	6.88333	18.9667
	6.96667	9.21667	11.0833	17.85
	8.05	13.1833	10.95	13.0667
	5.21667	6.81667	13.95	14.1333
	8.06667	10.9833	5.85	12.2167
			9.78333

## Sheet: Time to peak in renal medulla
	WT-con-IR	TRPV1-/-con-IR	WT-WD-IR	TRPV1-/-WD-IR
	4.96667	6.01667	14.2	16.8833
	4.28333	11.9833	11.55	23.9667
	8.63333	12.5	11.0833	22.85
	8.05	13.1833	14.2833	19.7333
	8.55	10.15	17.2833	14.1333
	9.71667	9.63333	15.1833	15.55
			13.0167

## Sheet: Urine LDH
	WT-con	WT-con-IR	TRPV1-/-con-IR	WT-WD-IR	TRPV1-/-WD-IR
	43.2234	82.1489	249.34	208.401	278.105
	54.2005	115.178	161.307	222.64	241.491
	54.6447	161.39	170.277	163.187	269.899
	47.0939	146.055	202.217	130.279	255.666
	50.3934	162.961	217.868	159.697	170
	47.4746	179.581	103.376	157.265	166.091
	25.4061	69.3147	167.953	124.797	183.071
	18.8071	142.018	155.533	158.477	235.635

## Sheet: Plasma creatinine
	WT-con	WT-con-IR	TRPV1-/-con-IR	WT-WD-IR	TRPV1-/-WD-IR
	0.0402399	0.0987706	0.138831	0.154063	0.188846
	0.037961	0.097931	0.141349	0.0934932	0.154783
	0.0416792	0.0946927	0.113523	0.15934	0.189445
	0.041919	0.0956522	0.116282	0.12036	0.191964
	0.0581109	0.105487	0.135112	0.130795	0.161619
	0.0455172	0.103928	0.133193	0.131514	0.151904

## Sheet: Plasma urea
	WT-con	WT-con-IR	TRPV1-/-con-IR	WT-WD-IR	TRPV1-/-WD-IR
	13.0137	16.3562	18.4931	23.2055	22.4657
	12.4657	16.9863	17.9178	22.548	22.9041
	12.7945	16.4657	19.6712	25.6986	29.8356
	13.5343	16	19.4794	20.3014	29.8082
	14	16.8219	19.8904	19.1781	19.6986
	13.726	16.1644	19.3151	19.9452	18.4931
	12.8493	18.4384	19.589	20.137	29.726
	12	18.4384	21.0685	19.5616	30.9589

[truncated: 6 more sheets: CGRP, Recovery in renal cortex 2, Recovery in renal medulla 2, Urine LDH 2, Plasma Urea 2, Plasma creatinine 2]
